# Supplementary material for: Dynamic brain-to-brain concordance and behavioral mirroring as a mechanism of the patient-clinician interaction
Source: bioRxiv or medRxiv preprint supplement (doi:10.1101/2020.08.05.237511), 2020-08-06
Supplement: Supplementary file [file media-1.pdf]

# 1 **Supplementary Methods and Materials**

2

## 3 **Stimuli**

4

### 5 *Evoked cuff pain*

6 Deep-tissue pain was applied using the Hokanson Rapid Cuff Inflator (D. E. Hokanson, Inc.,  
7 Bellevue, WA, USA). Compared to cutaneous quantitative sensory testing (QST) techniques (e.g.,  
8 contact heat), deep sustained pain better mimics clinical pain (1, 2), thus providing a more  
9 clinically-relevant measure. Unlike more superficial methods of evaluating mechanical sensitivity,  
10 cuff pain responses are only marginally affected by sensitization or desensitization of the skin,  
11 indicating that this procedure primarily assesses sensitivity in muscle and other deep tissues (3–6).  
12 Such cuff pressure algometry is a recently characterized method that is now included in many QST  
13 evaluations (3, 4, 7). We have considerable experience applying these techniques in chronic pain  
14 patients, with and without neuroimaging, and have found that even subjects with severe  
15 fibromyalgia are generally able to tolerate these procedures without any lasting discomfort (8, 9).  
16 The cuff was attached to the patient’s left lower leg prior to scanning and was inflated for 15 s  
17 duration trials during the experiment.

18

### 19 *Electroacupuncture*

20 Our decision to use electroacupuncture applied by acupuncturists for evoked cuff pain as an  
21 experimental model for dyadic interaction with pain therapy was motivated by our aim to  
22 investigate both a consultation/intake and actual treatment with measurable pain outcomes. As

23 opposed to many other pain therapies, this electroacupuncture/cuff pain model enabled us to  
24 incorporate acute pain therapy in the MRI environment, with acupuncturists remotely applying  
25 treatment relevant to their clinical practice, thus increasing ecological validity while maintaining  
26 experimental control.

27 Prior to experimental testing, patients had acupuncture needles (0.20 mm diameter, 25 cm  
28 length, Asiamed gauge) inserted with approximately 2-3cm depth at acupoints ST-34 and SP-10 on  
29 the anterior/distal aspect of the lower thigh, proximal to the cuff, with electrodes attached to each  
30 needle. While we were interested in the influence of therapeutic alliance, and not specific  
31 acupuncture effects, on pain outcomes, we wanted to avoid the need for authorized deception in  
32 clinicians' IRB consent form. We therefore included trials with both verum and sham electro-  
33 acupuncture in a double-blind manner. We used a minimal sub-sensory threshold level (0.1 mA)  
34 for verum trials in order to avoid unblinding patients due to any sensory feedback from the electrical  
35 stimulation. Thus, verum/sham electro-acupuncture was administered in a double-blind manner, in  
36 a pseudorandomized order across trials. Clinicians were instructed to press-and-hold one button for  
37 applying treatment, and another ("inactive") button for No-treatment.

38 We did not hypothesize differences in pain for verum vs sham electro-acupuncture  
39 treatment, and indeed, a paired t-test comparing patient-rated pain intensity between verum and  
40 sham trials did not suggest a difference in pain intensity ( $t=0.83$ ,  $P=0.42$ ). Consequently, we pooled  
41 verum/sham trials as 'Treatment' in further statistical analyses, and interpreted intra-individual  
42 differences between 'Treatment' and 'No-Treatment' trials as psychosocially induced pain relief  
43 ('analgesia').

44

## 45 **MRI acquisition and preprocessing**

46

### 47 *MRI acquisition*

48 Blood oxygen level-dependent (BOLD) fMRI data were collected from each scanner (Patient  
49 scanner: Siemens 3T Skyra; Clinician scanner: Siemens 3T Prisma) using a whole brain,  
50 simultaneous multi-slice, T2\*-weighted gradient echo BOLD echo-planar imaging pulse sequence  
51 (repetition time = 1250 ms, echo time = 33 ms, flip angle = 65°, voxel size = 2 cm isotropic, number  
52 of slices = 75, Simultaneous Multi-Slice factor = 5). A high-resolution structural volume (multi-  
53 echo MPRAGE) was collected to facilitate anatomical localization and spatial registration of  
54 individual fMRI-BOLD volumes to MNI152 standard space (repetition time = 2530 ms, echo time  
55 = 1.69 ms, flip angle = 7°, voxel size = 1 mm isotropic). Importantly, to enable a full-face view of  
56 each participant for better facial expression tracking by research subjects and the facial expression  
57 digitization software (see below), we combined the occipital/bottom portion of a 64 Channel head  
58 coil with a flex coil (4 channel) attached to the forehead.

59

### 60 *fMRI preprocessing*

61 Preprocessing of individual fMRI datasets was carried out using tools from FMRIB's Software  
62 Library (FSL, v6.0.0; [www.fmrib.ox.ac.uk/fsl](http://www.fmrib.ox.ac.uk/fsl)), and included the following steps: slice-timing  
63 correction, motion correction (MCFLIRT) (10), correction of spatial inhomogeneity (TOPUP) (11,  
64 12), nonbrain tissue removal (BET) (13), spatial smoothing (full width at half maximum = 4mm),  
65 temporal high-pass filtering ( $f=0.011$  Hz as computed by FSL's `cutoffcalc`), and grand-mean  
66 intensity normalization by a single multiplicative factor. For each subject, both runs were realigned  
67 (6 degrees of freedom) to a common space (7th volume of the first run) before the first-level general  
68 linear model (GLM) analyses. The transformation matrix for registration between functional and

69 high-resolution anatomical volumes was calculated using Boundary Based Registration (bbsregister,  
70 Freesurfer, v6.0.0 (14)). Two participants had one of their two fMRI runs excluded from analysis  
71 due to excessive head motion, based on the following exclusion criteria: 1)  $>2^\circ$  head rotation in any  
72 direction, and 2)  $>2$  mm frame-by-frame displacement. After excluding these data, mean head  
73 rotation was  $0.05\pm 0.02$  (mean $\pm$ SD) and mean frame-by-frame displacement was  $0.13\pm 0.05$ . An  
74 unpaired t-test indicated higher frame-by-frame displacement for patients ( $0.15\pm 0.05$ ) relative to  
75 clinicians ( $0.11\pm 0.04$ ,  $t=4.32$ ,  $P<0.001$ ), but there was no significant group difference for rotation  
76 ( $t=1.74$ ,  $P=0.09$ ). For registration from structural to standard space (Montreal Neurological  
77 Institute, MNI, 152), we used FSL's Linear registration tool (FLIRT, 12 degrees of freedom) (10,  
78 15), followed by FSL's non-linear registration tool (FNIRT) (16). All single-subject analyses were  
79 performed in functional space, and then registered to MNI152 standard space before dyadic and  
80 group analyses.

81

## 82 **References**

- 83 1. P. Rainville, J. S. Feine, M. C. Bushnell, G. H. Duncan, A Psychophysical Comparison of  
84 Sensory and Affective Responses to Four Modalities of Experimental Pain. *Somatosensory*  
85 *& Motor Research*. **9**, 265–277 (1992).
- 86 2. M. Curatolo, L. Arendt-Nielsen, S. Petersen-Felix, Central Hypersensitivity in Chronic Pain:  
87 Mechanisms and Clinical Implications. *Physical Medicine and Rehabilitation Clinics*. **17**,  
88 287–302 (2006).
- 89 3. R. Polianskis, T. Graven-Nielsen, L. Arendt-Nielsen, Spatial and temporal aspects of deep  
90 tissue pain assessed by cuff algometry. *Pain*. **100**, 19–26 (2002).
- 91 4. R. Polianskis, T. Graven-Nielsen, L. Arendt-Nielsen, Pressure-pain function in desensitized  
92 and hypersensitized muscle and skin assessed by cuff algometry. *The Journal of Pain*. **3**, 28–  
93 37 (2002).
- 94 5. R. Polianskis, T. Graven-Nielsen, L. Arendt-Nielsen, Modality-specific facilitation and  
95 adaptation to painful tonic stimulation in humans. *European Journal of Pain*. **6**, 475–484  
96 (2002).

- 97 6. R. Polianskis, T. Graven-Nielsen, L. Arendt-Nielsen, Computer-controlled pneumatic  
98 pressure algometry—a new technique for quantitative sensory testing. *European Journal of*  
99 *Pain*. **5**, 267–277 (2001).
- 00 7. V. Napadow, R. R. Edwards, C. M. Cahalan, G. Mensing, S. Greenbaum, A. Valovska, A. Li,  
01 J. Kim, Y. Maeda, K. Park, A. D. Wasan, Evoked Pain Analgesia in Chronic Pelvic Pain  
02 Patients Using Respiratory-Gated Auricular Vagal Afferent Nerve Stimulation. *Pain Med*.  
03 **13**, 777–789 (2012).
- 04 8. M. L. Loggia, C. Berna, J. Kim, C. M. Cahalan, R. L. Gollub, A. D. Wasan, R. E. Harris, R.  
05 R. Edwards, V. Napadow, Disrupted brain circuitry for pain-related reward/punishment in  
06 fibromyalgia. *Arthritis Rheumatol*. **66**, 203–12 (2014).
- 07 9. J. Kim, M. L. Loggia, C. M. Cahalan, R. E. Harris, F. Beissner, R. G. Garcia, H. Kim, R.  
08 Barbieri, A. D. Wasan, R. R. Edwards, V. Napadow, The somatosensory link in  
09 fibromyalgia: functional connectivity of the primary somatosensory cortex is altered by  
10 sustained pain and is associated with clinical/autonomic dysfunction. *Arthritis Rheumatol*.  
11 **67**, 1395–405 (2015).
- 12 10. M. Jenkinson, P. Bannister, M. Brady, S. Smith, Improved optimization for the robust and  
13 accurate linear registration and motion correction of brain images. *Neuroimage*. **17**, 825–841  
14 (2002).
- 15 11. J. L. R. Andersson, S. Skare, J. Ashburner, How to correct susceptibility distortions in spin-  
16 echo echo-planar images: application to diffusion tensor imaging. *Neuroimage*. **20**, 870–888  
17 (2003).
- 18 12. S. M. Smith, M. Jenkinson, M. W. Woolrich, C. F. Beckmann, T. E. J. Behrens, H. Johansen-  
19 Berg, P. R. Bannister, M. De Luca, I. Drobnjak, D. E. Flitney, R. K. Niazy, J. Saunders, J.  
20 Vickers, Y. Y. Zhang, N. De Stefano, J. M. Brady, P. M. Matthews, Advances in functional  
21 and structural MR image analysis and implementation as FSL. *Neuroimage*. **23**, S208–S219  
22 (2004).
- 23 13. S. M. Smith, Fast robust automated brain extraction. *Human brain mapping*. **17**, 143–55  
24 (2002).
- 25 14. D. N. Greve, B. Fischl, Accurate and robust brain image alignment using boundary-based  
26 registration. *Neuroimage*. **48**, 63–72 (2009).
- 27 15. M. Jenkinson, S. Smith, A global optimisation method for robust affine registration of brain  
28 images. *Medical image analysis*. **5**, 143–56 (2001).
- 29 16. J. Andersson, M. Jenkinson, S. Smith, “Non-linear registration, aka spatial normalisation,  
30 FMRIB technical report TR07JA2” (2010).
- 31 17. M. Zunhammer, U. Bingel, T. D. Wager, C. Placebo Imaging, Placebo Effects on the  
32 Neurologic Pain Signature: A Meta-analysis of Individual Participant Functional Magnetic  
33 Resonance Imaging Data. *JAMA Neurol*. **75**, 1321–1330 (2018).
- 34 18. T. D. Wager, L. Y. Atlas, M. A. Lindquist, M. Roy, C.-W. Woo, E. Kross, An fMRI-Based  
35 Neurologic Signature of Physical Pain. *New England Journal of Medicine*. **368**, 1388–1397  
36 (2013).

## Supplementary Figures

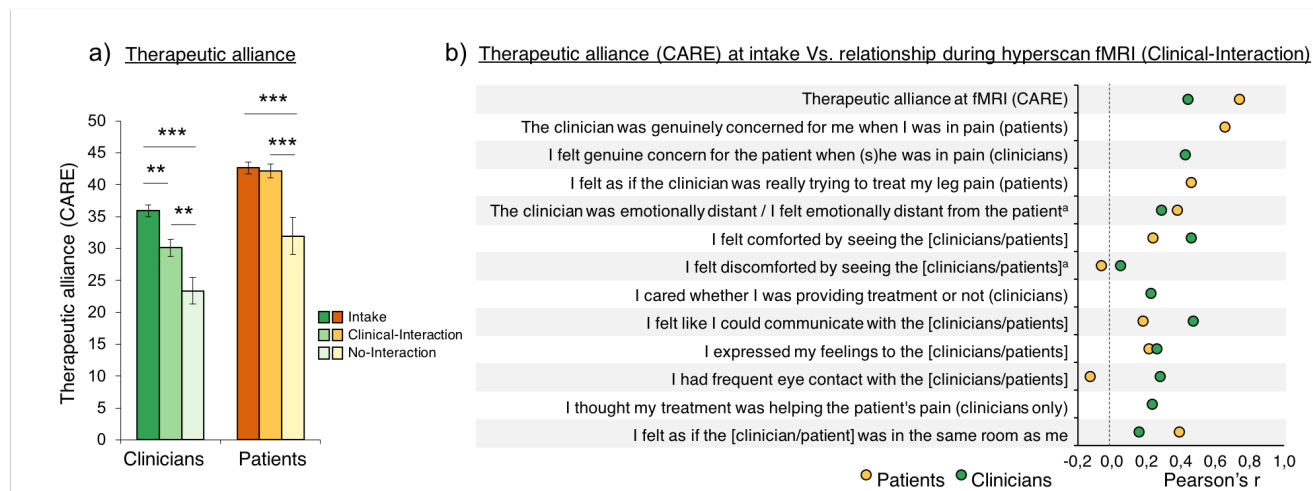

**Fig. S1 | Self-reported patient-clinician therapeutic alliance (CARE) across sessions.** a) Similarly to patients (see main Article), clinicians reported different levels of therapeutic alliance (CARE scores) depending of the context of the dyadic clinical interaction ( $F(1.82,25.42)=12.83$ ,  $P<0.001$ ,  $\eta^2=0.48$ ). Specifically, the No-interaction MRI context (mean±SD=23.56±7.94) was rated lower than both Intake (35.69±4.08,  $t=5.95$ ,  $P<0.001$ , Cohen's  $d=1.49$ , 95% Confidence Interval [CI]=6.63,17.62) and Clinical-Interaction MRI (30.25±5.89,  $t=2.84$ ,  $P=0.01$ ,  $d=0.71$ , CI=0.34,13.03) contexts. Furthermore, therapeutic alliance at Intake was rated higher than at Clinical-Interaction MRI ( $t=3.11$ ,  $P=0.01$ ,  $d=0.78$ , CI=0.72,10.16). There was no significant effect of order for neither patient-rated CARE ( $F(1.34,18,76)=1.07$ ,  $P=0.34$ ,  $\eta^2=0.07$ ) nor clinician-rated CARE ( $F(1.82,25.42)$ ,  $P=0.63$ ,  $\eta^2=0.03$ ). b) An ANCOVA indicated that higher therapeutic alliance (CARE scores) at intake positively predicted evaluations of the relationship ('HRS score') at the subsequent Clinical-Interaction MRI, across a range of items related to the relationship and social interaction. This association was evident for both for the patient-rated ( $F(1,144)=9.33$ ,  $P=0.003$ ,  $\eta^2=0.06$ ) and the clinician-rated ( $F(1,160)=12.24$ ,  $P<0.001$ ,  $\eta^2=0.07$ ) scales, indicating the relationship and rapport established at the intake was successfully carried over to the Clinical-Interaction MRI, which was completed on a separate day. There were no main effects or statistical interactions involving 'HRS Item' for neither patients nor clinicians ( $P$ 's>0.39), suggesting the association between therapeutic alliance at

56 intake Vs relationship at MRI, as well as HRS scores overall, was not different depending on HRS items.  
57 Error bars represent Standard error of the mean; <sup>a</sup>Reversed score; CARE=Consultation And Relational  
58 Empathy scale.

59

### Pressure pain, Patients<sub>Treat-NoTreat</sub>

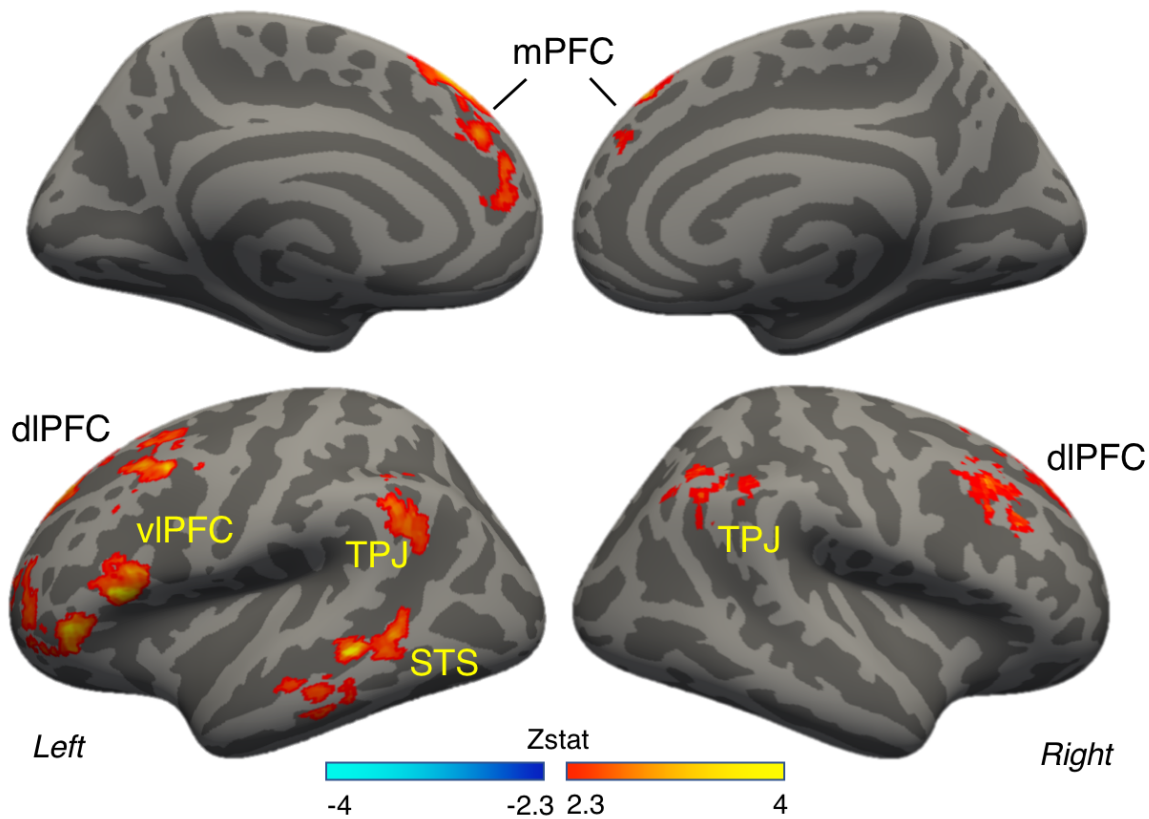

60

61 **Fig. S2 | Group map displaying areas where patients showed significant treatment-related (Treat –**  
62 **NoTreat) increase in brain response to pressure pain, thresholded at  $Z=2.3$ ,  $P=0.05$ , cluster-corrected**  
63 **for multiple comparisons.** A whole-brain GLM demonstrated increased fMRI activation of bilateral vlPFC,  
64 TPJ, dlPFC, and mPFC, in addition to left STS for treated, relative to nontreated, pain. There were no  
65 significant effects in the opposite direction (NoTreat – Treat). This is consistent with a recent meta-analysis  
66 of experimental fMRI studies investigating placebo analgesia (17), showing that while placebo analgesia  
67 was seen in all studies, there was only a marginal BOLD reduction of pain-processing circuitry (18).  
68 mPFC=medial Prefrontal Cortex; dlPFC=dorsolateral Prefrontal Cortex; vlPFC=ventrolateral Prefrontal  
69 Cortex; TPJ=Temporoparietal Junction; STS=Superior Parietal Junction.

70



**Correlation, Patients' Pain<sub>Treat-NoTreat</sub> Vs placebo analgesia**

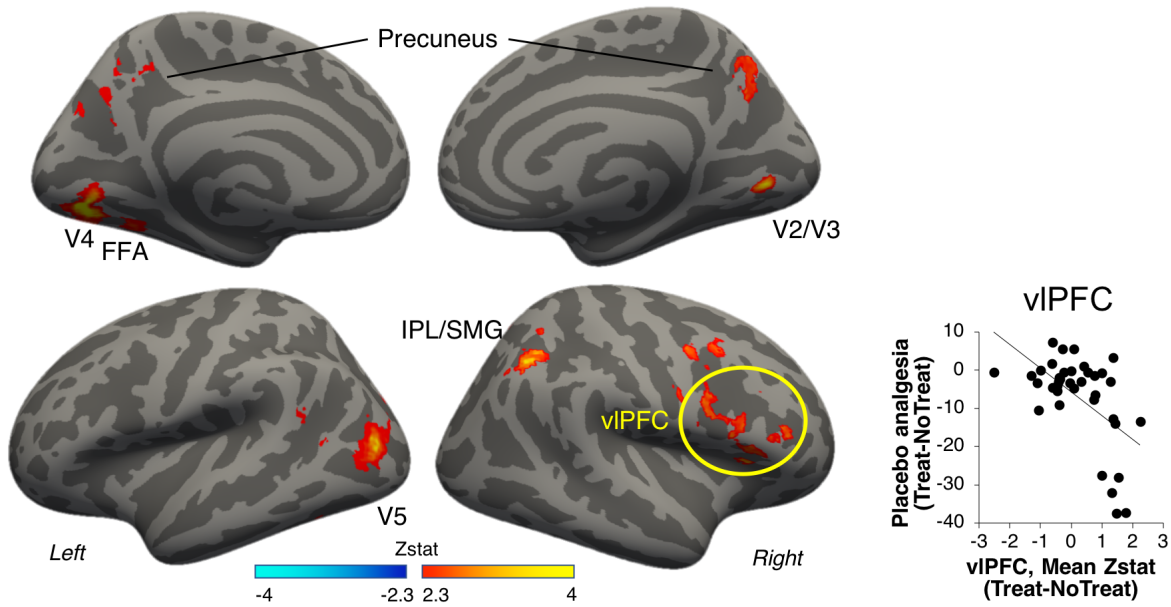

71

72 **Fig. S3 | Group map showing areas where stronger treatment-related increases (Treat-NoTreat) in**  
 73 **patients' brain response to pressure pain was significantly associated with stronger analgesia**  
 74 **(NoTreat-Treat, pain ratings), as indicated by a whole-brain regression analysis.** The displayed group  
 75 map was thresholded at  $Z=2.3$ ,  $P=0.05$ , cluster-corrected for multiple comparisons. V2-5=Visual areas 1-5;  
 76 FFA=Fusiform Face Area; IPL=Inferior Parietal Lobule; SMG=Supramarginal Gyrus; vIPFC=ventrolateral  
 77 Prefrontal Cortex.

78

**Overall brain response to Pain / Vicarious pain (Treat, NoTreat)**

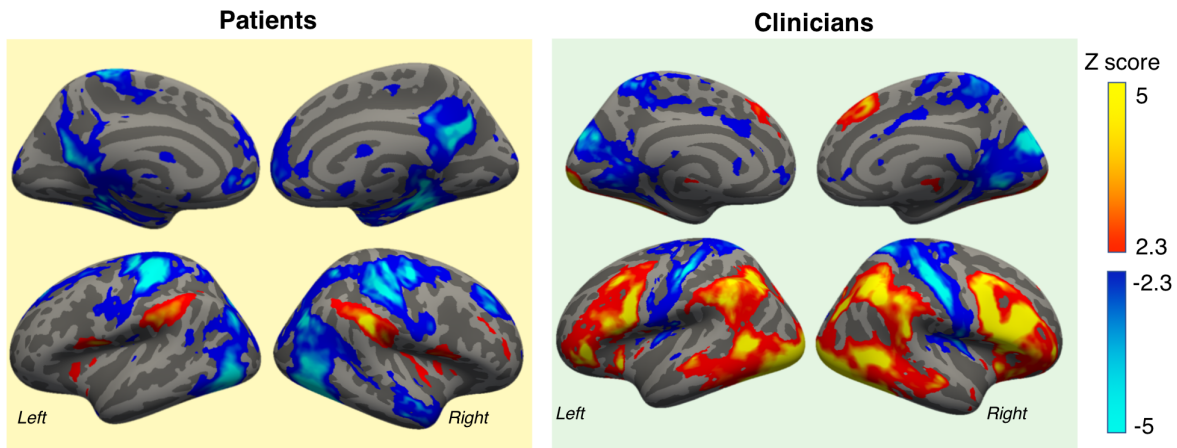

79

80 **Fig. S4 | Group maps showing overall response to pain (patients, left) and vicarious pain (clinicians,**  
81 **right), collapsed over Treat/NoTreat conditions.** The displayed group maps were thresholded at  $Z=2.3$ ,  
82  $P=0.05$ , cluster-corrected for multiple comparisons.

83

**1. First-level GLM (Whole-brain), modeling each trial separately**

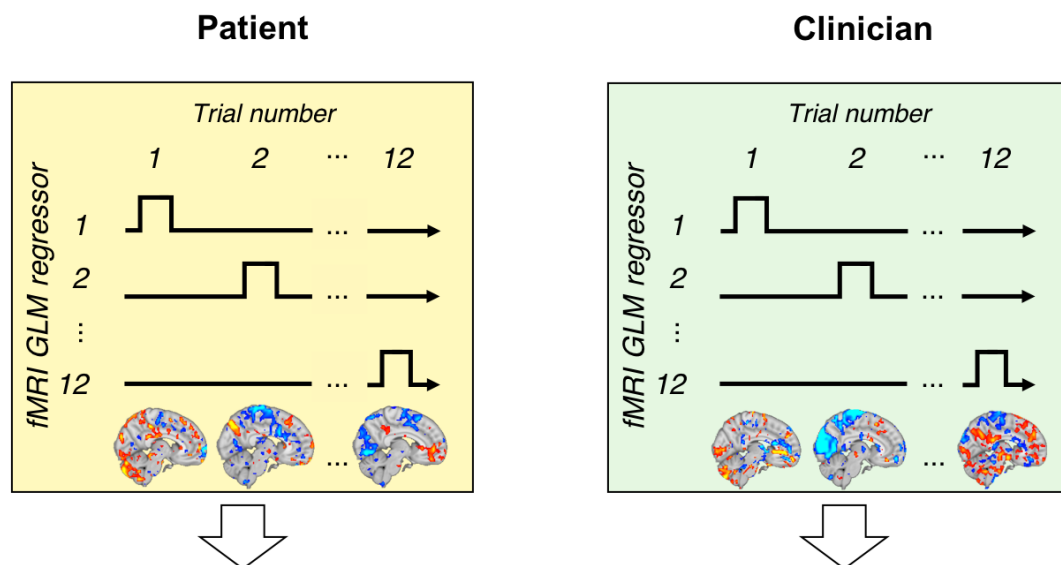

**2. Patient ROI extraction (trial-by-trial)**

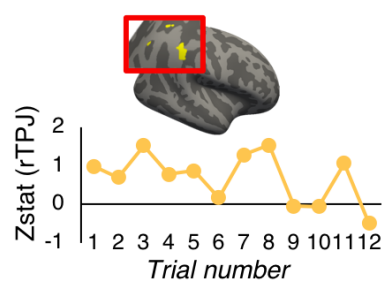

**3. Second-level regression for each dyad (fixed-effects GLM)**

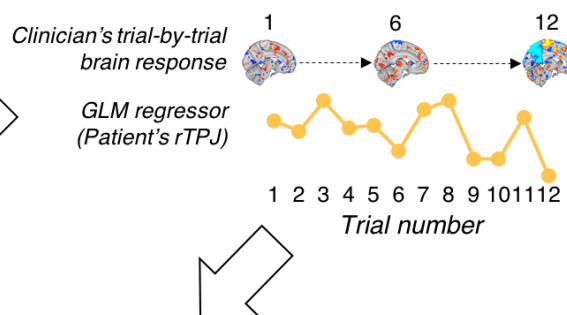

**4. Dynamic concordance group map (for all dyads w/patients' rTPJ)**

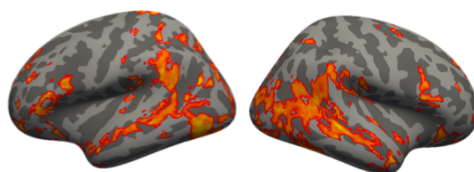

84

85 **Fig. S5 | Dynamic concordance analysis pipeline.** 1. To investigate dynamic (time-varying) concordance  
86 between patients and clinicians, we first performed a first-level GLM for each subject, where each trial  
87 (anticipation phase) was modeled as a separate regressor. This resulted in 12 voxel-wise whole-brain maps  
88 (one per trial). 2. For each trial, mean Zstat values were extracted from the patient's social mirroring ROIs  
89 (e.g. rTPJ), as identified by a patient-clinician conjunction analysis (see Fig. a). 3. These ROI scores were  
90 then used as a regressor in a second-level fixed-effects GLM for the clinician's trial-by-trial brain response

91 during anticipation, which produced a whole-brain map of regions where the clinician's brain response  
92 showed dynamic (time-varying) concordance with the patient's social mirroring circuitry (e.g. rTPJ). 4.  
93 These steps were taken for each individual dyad, and dynamic concordance maps across dyads were then  
94 combined for group analyses. ROI=Region of Interest; rTPJ= right Temporoparietal Junction.

95

**Dynamic concordance with alternative nodes of the social mirroring circuitry  
(Clinical-Interaction – No-Interaction group contrast)**

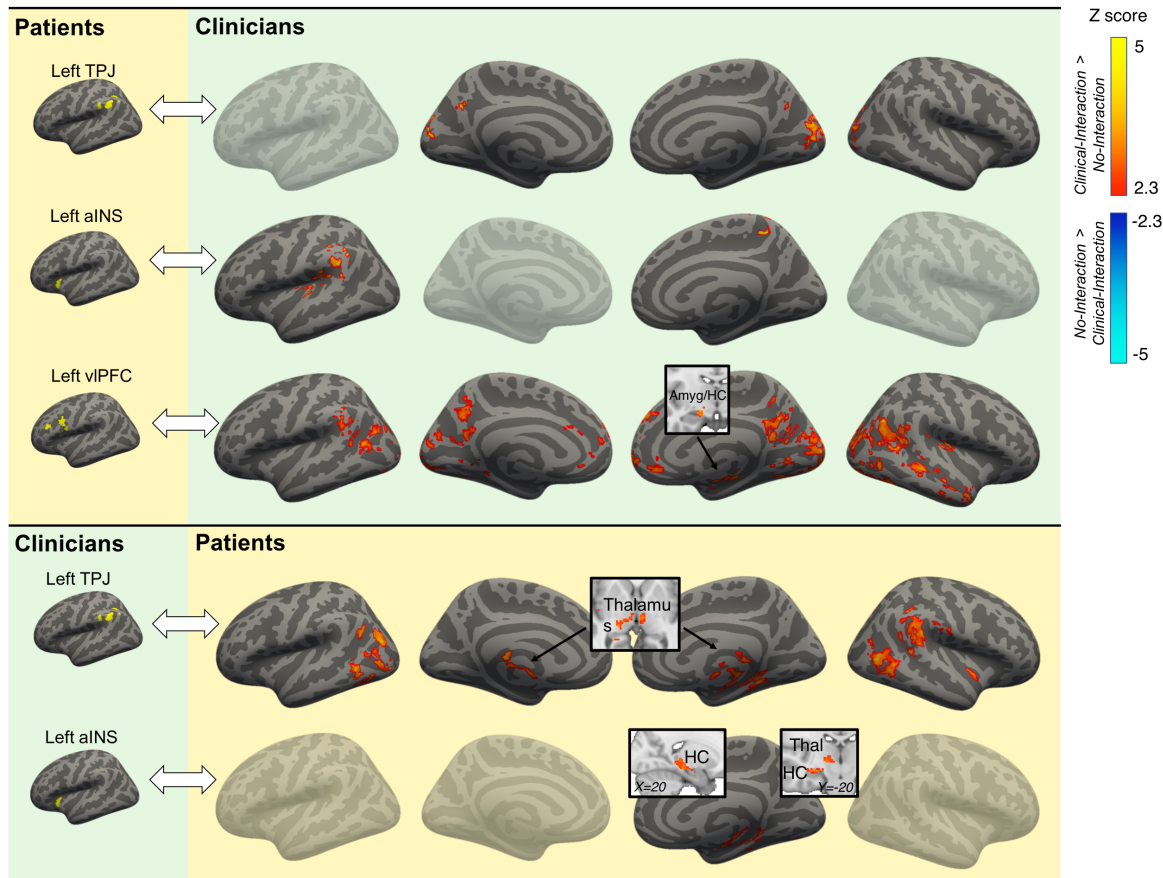

97

98 **Fig. S6 | Dynamic concordance with alternative nodes of the social mirroring circuitry.** Each row shows  
 99 a group contrast (Clinical-Interaction – No-Interaction) of dynamic concordance with different social  
 00 mirroring ROIs from the partner, as identified by the patient-clinician conjunction group analysis. The top 3  
 01 rows show clinician whole-brain concordance with patients' social mirroring ROIs. Patients' left TPJ  
 02 showed increased concordance with clinicians' precuneus and medial visual cortex for Clinical-Interaction  
 03 relative to No-Interaction. For the same contrast, patients' left aINS showed increased concordance with  
 04 clinicians' left TPJ, left posterior insula, and right S1. Left vIPFC showed increased concordance with  
 05 clinicians' left TPJ, right amygdala/hippocampus, bilateral STS, right mid/posterior insula,  
 06 vmPFC/pregenual ACC (pgACC), dmPFC, lateral/medial visual cortex, and precuneus. The bottom 2 rows  
 07 show patient whole-brain concordance with clinicians' social mirroring ROIs. Clinicians' left TPJ showed  
 08 increased concordance with patients' right TPJ, right aINS, right STS, lateral visual cortex, and bilateral

09 thalamus for Clinical-Interaction relative to No-Interaction. Left aINS showed increased concordance with  
10 the right HC and the right thalamus. None of these contrasts showed significant differences in the opposite  
11 direction (No-Interaction – Clinical-Interaction). No other nodes of the social mirroring circuitry showed  
12 differences in concordance between Clinical-Interaction and No-Interaction. The displayed group maps were  
13 thresholded at  $Z=2.3$ ,  $P=0.05$ , cluster-corrected for multiple comparisons. There were no significant effects  
14 in the opposite direction (No-Interaction – Clinical-Interaction). TPJ=Temporoparietal Junction;  
15 aINS=anterior Insula; vlPFC=ventrolateral Prefrontal Cortex; Amyg=Amygdala; HC=Hippocampus.

16

17
